# Supplementary material for: Symmetric and unsymmetric thienyl-substituted fluorenone dyes: static excimer-induced emission enhancement
Source: Royal Society of Chemistry journal article supplement (doi:10.1039/c6ra13102f), 2016-01-01
Supplement: c6ra13102f1.pdf [file c6ra13102f1.pdf]

## Supplementary Information for

### Symmetric and unsymmetric thienyl-substituted fluorenone dyes: static excimer-induced emission enhancement

Fan Xu,<sup>a</sup> Mao-Sen Yuan,<sup>\*a,b</sup> Wenji Wang,<sup>a</sup> Xianchao Du,<sup>a</sup> Hui Wang,<sup>a</sup> Na Li,<sup>a</sup> Ruijin Yu,<sup>a</sup>  
Zhenting Du<sup>a</sup> and Jinyi Wang<sup>\*a</sup>

<sup>a</sup> College of Science, Northwest A&F University, Yangling 712100, P.R. China, Fax: +86 29 87082520;  
Tel: +86 29 87082520; E-mail: yuanms@nwsuaf.edu.cn; jywang@nwsuaf.edu.cn

<sup>b</sup> State Key Laboratory of Crystal Materials, Shandong University, Jinan 250100, P. R. China

|                                                    |     |
|----------------------------------------------------|-----|
| 1. Single-Crystal Structure .....                  | S2  |
| 2. Theoretical calculation.....                    | S3  |
| 3. <sup>1</sup> H NMR and <sup>13</sup> C NMR..... | S5  |
| 4. TOF-MS-EI.....                                  | S13 |

## 1. Single-Crystal Structure

**Table S1.** Selected Crystallographic Data for **ATPF**.

| Compound                              | <b>ATPF</b>                                      |
|---------------------------------------|--------------------------------------------------|
| Empirical formula                     | C <sub>19</sub> H <sub>12</sub> O <sub>2</sub> S |
| Formula mass                          | 304.35                                           |
| Crystal color                         | yellow                                           |
| crystal size (mm <sup>3</sup> )       | 0.48×0.31×0.10                                   |
| Crystal system                        | Triclinic                                        |
| Space group                           | <i>P</i> -1                                      |
| <i>a</i> [Å]                          | 6.1090(6)                                        |
| <i>c</i> [Å]                          | 15.5179(14)                                      |
| <i>V</i> [Å <sup>3</sup> ]            | 699.34(11)                                       |
| <i>Z</i>                              | 2                                                |
| $\rho$ (calcd, g/cm <sup>3</sup> )    | 1.445                                            |
| $\mu$ [mm <sup>-1</sup> ]             | 0.235                                            |
| <i>F</i> (000)                        | 316                                              |
| $\theta_{\min}$ - $\theta_{\max}$ [°] | 2.702-23.81                                      |
| <i>T</i> / K                          | 298(2)                                           |
| Collected reflections                 | 2387                                             |
| Unique reflections                    | 1549                                             |
| <i>R</i> / <i>wR</i>                  | 0.1030/0.2690                                    |

## 2. Theoretical Calculation

**Table S2.** The graphic representations of the frontier molecular orbits of **ATPF single-molecule**.

|                                       |                                                                                      |                                                                                                                                                 |
|---------------------------------------|--------------------------------------------------------------------------------------|-------------------------------------------------------------------------------------------------------------------------------------------------|
| <b>ATPF single-molecule</b>           | 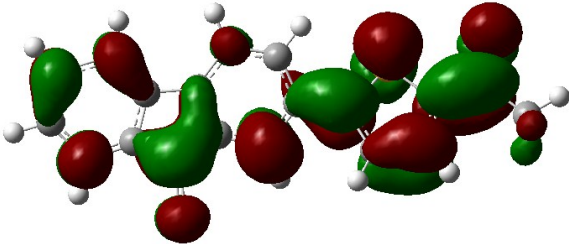   | Excited State 1: Singlet-A<br>2.8624 eV<br>433.14 nm<br>$f=0.0969$<br>79 → 80 0.67617<br>79 → 81 0.16283                                        |
| <b>LUMO+1</b><br>No.81<br>-0.07190 au |                                                                                      | Excited State 2: Singlet-A<br>3.1201 eV<br>397.38 nm<br>$f=0.0002$<br>76 → 80 0.25725<br>77 → 80 0.61396<br>77 → 81 0.20303                     |
| <b>LUMO</b><br>No.80<br>-0.09260 au   |     | Excited State 3: Singlet-A<br>3.5296 eV<br>351.27 nm<br>$f=0.0074$<br>78 → 80 -0.46549<br>78 → 81 0.47593<br>78 → 82 -0.18960                   |
| <b>HOMO</b><br>No.79<br>-0.21924 au   |    | Excited State 4: Singlet-A<br>3.6165 eV<br>342.83 nm<br>$f=0.5596$<br>74 → 80 0.11681<br>76 → 80 0.13770<br>79 → 80 -0.14466<br>79 → 81 0.65138 |
| <b>HOMO-1</b><br>No.78<br>-0.25309 au |  |                                                                                                                                                 |

**Table S3.** The graphic representations of the frontier molecular orbits of **ATPF Dimer**.

|                                   |                                                                                      |                                                                                                                                                                                              |
|-----------------------------------|--------------------------------------------------------------------------------------|----------------------------------------------------------------------------------------------------------------------------------------------------------------------------------------------|
| <b>ATPF<br/>Dimer<sup>-</sup></b> | 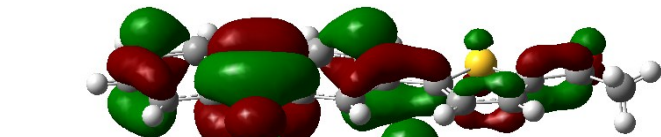   | Excited State 1: Singlet-A<br>2.5338 eV 489.31 nm<br>f=0.0725<br>158 ->159 0.69393                                                                                                           |
| <b>LUMO+1</b>                     |    | Excited State 2: Singlet-A<br>2.7157 eV 456.55 nm<br>f=0.0000<br>158 ->160 0.68739<br>158 ->161 0.11667                                                                                      |
| No.160                            | -0.08993 au                                                                          |                                                                                                                                                                                              |
| <b>LUMO</b>                       |    | Excited State 3: Singlet-A<br>2.9084 eV 426.30 nm<br>f=0.0000<br>157 ->159 0.68538                                                                                                           |
| No.159                            | -0.09861 au                                                                          |                                                                                                                                                                                              |
| <b>HOMO</b>                       |  | Excited State 4: Singlet-A<br>3.0151 eV 411.22 nm<br>f=0.0002<br>151 ->159 -0.10268<br>152 ->160 0.37633<br>152 ->161 0.14694<br>153 ->159 0.51728<br>153 ->162 0.12183<br>154 ->160 0.10303 |
| No.158                            | -0.20216 au                                                                          |                                                                                                                                                                                              |
| <b>HOMO-1</b>                     |  |                                                                                                                                                                                              |
| No.157                            | --0.21476 au                                                                         |                                                                                                                                                                                              |

### 3. $^1\text{H}$ NMR and $^{13}\text{C}$ NMR of CTPF, ATPF, BTPF and ETPF

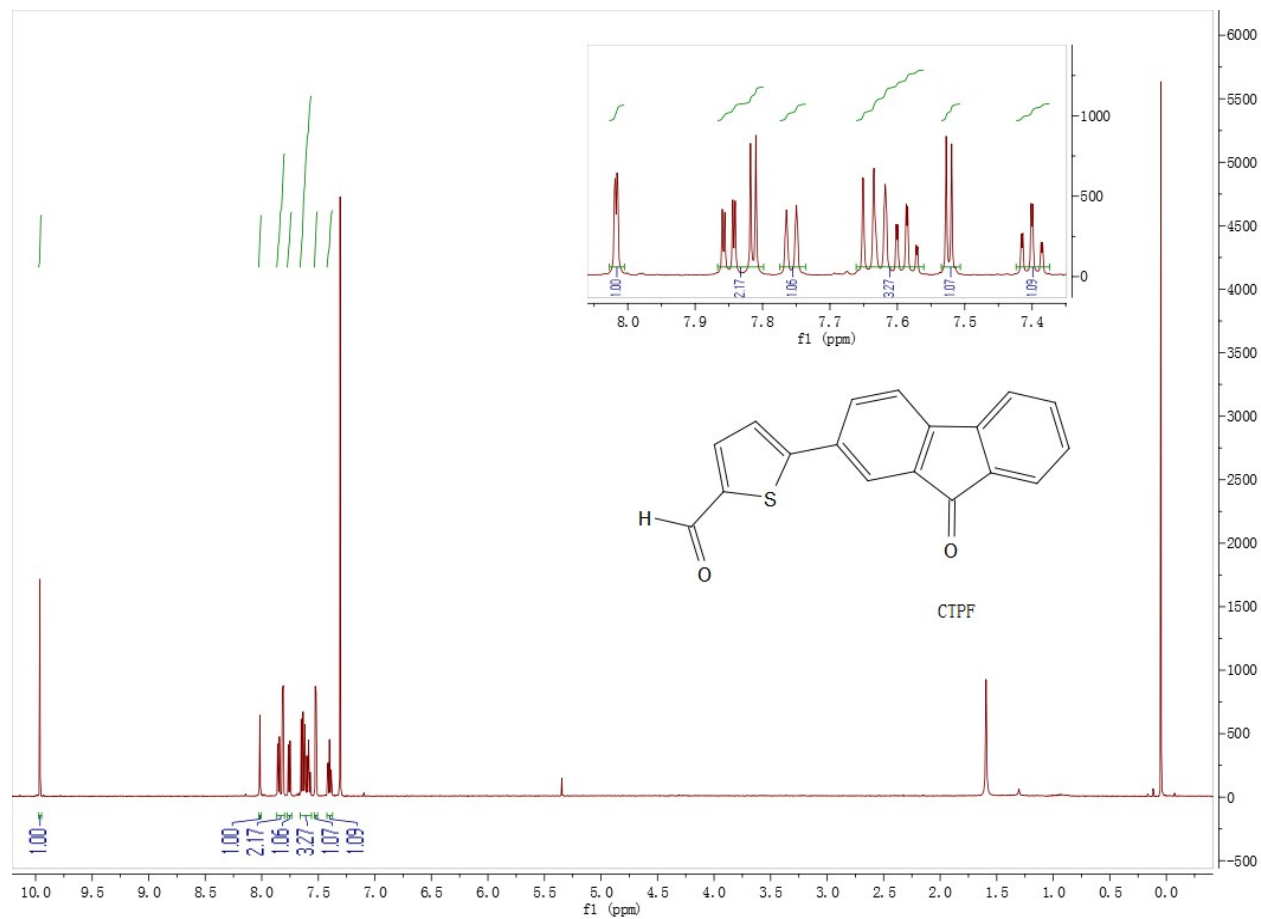

**Figure S1.**  $^1\text{H}$  NMR spectrum (500 MHz,  $\text{CDCl}_3$ ) of compound CTPF.

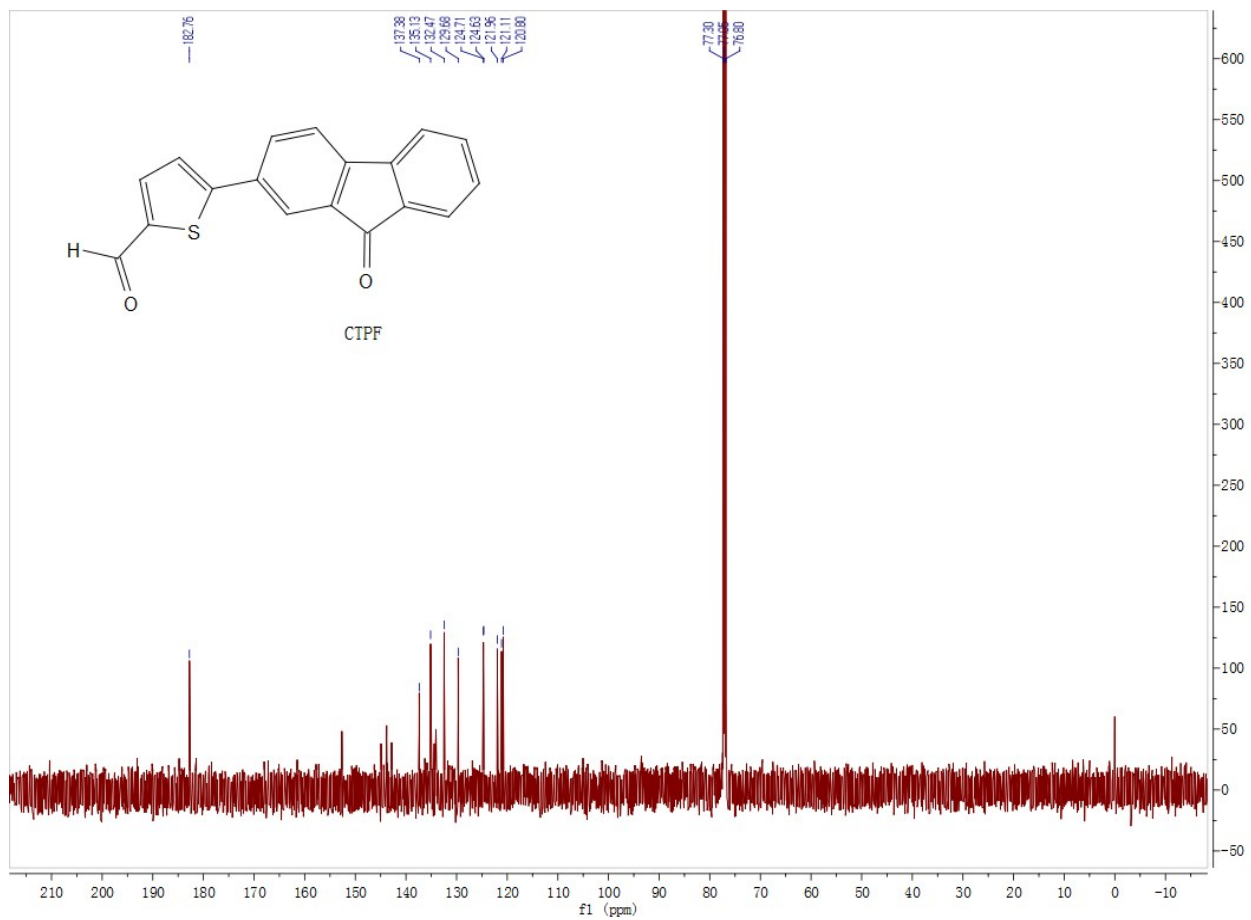

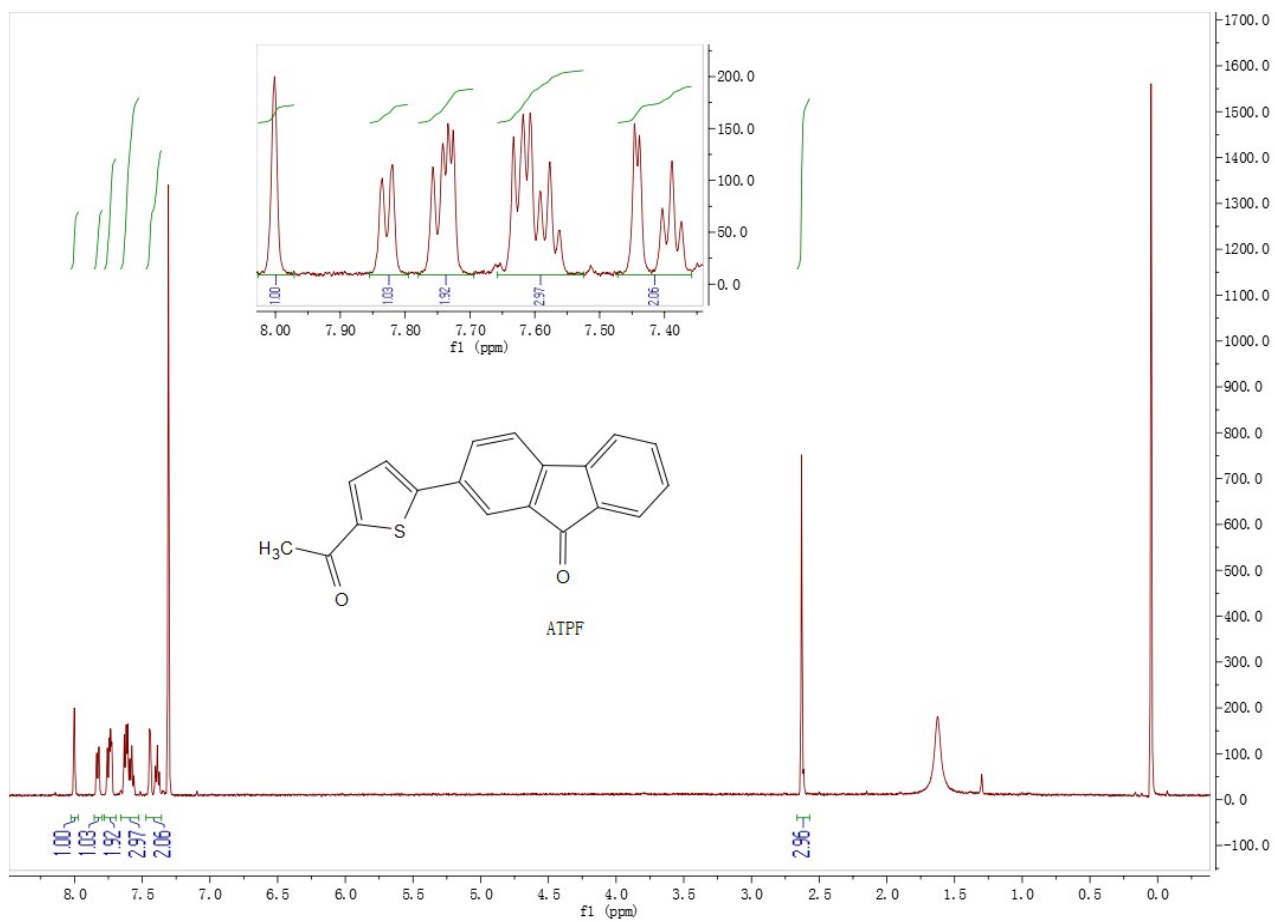

**Figure S3.** <sup>1</sup>H NMR spectrum (500 MHz, CDCl<sub>3</sub>) of compound ATPF.

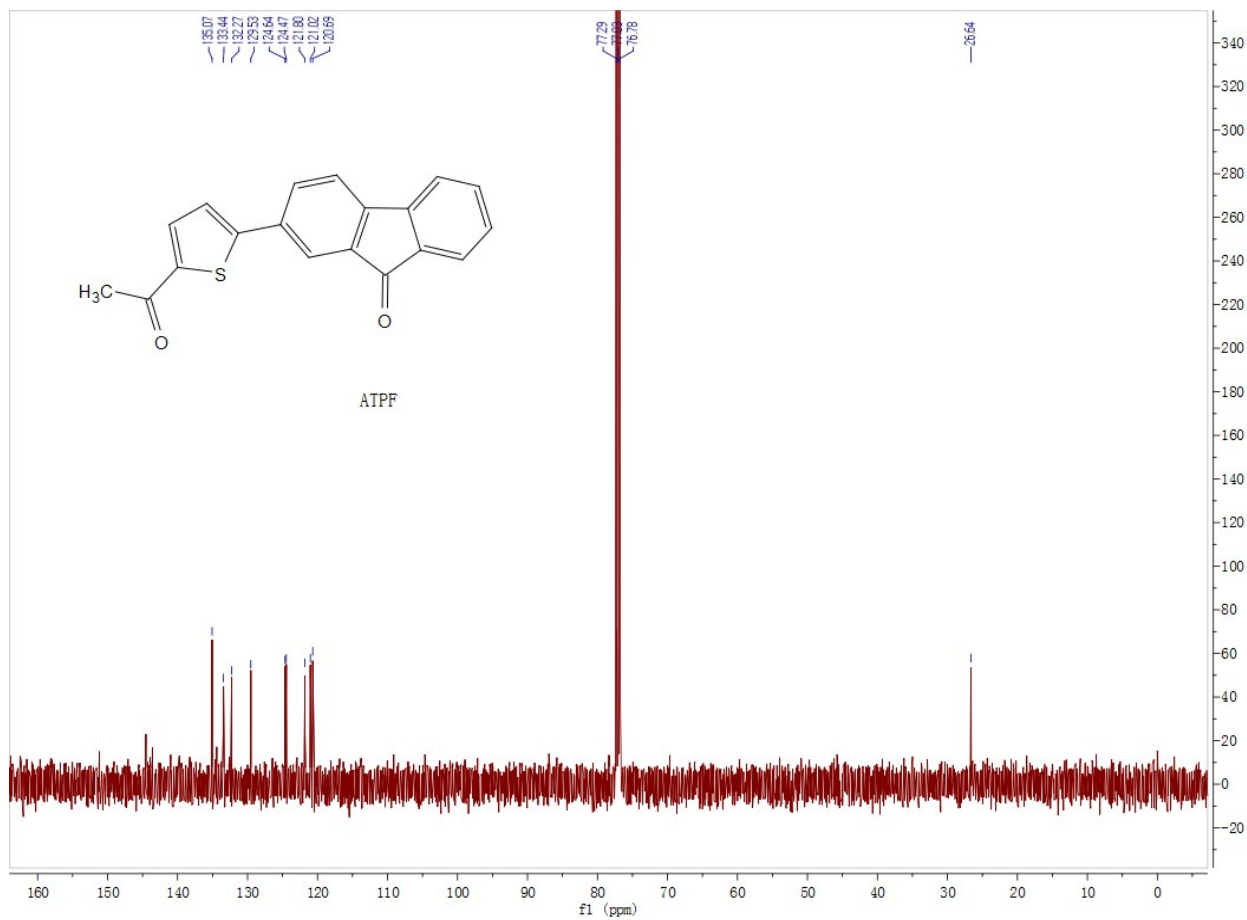

**Figure S4.**  $^{13}\text{C}$  NMR spectrum (125 MHz,  $\text{CDCl}_3$ ) of compound ATPF.



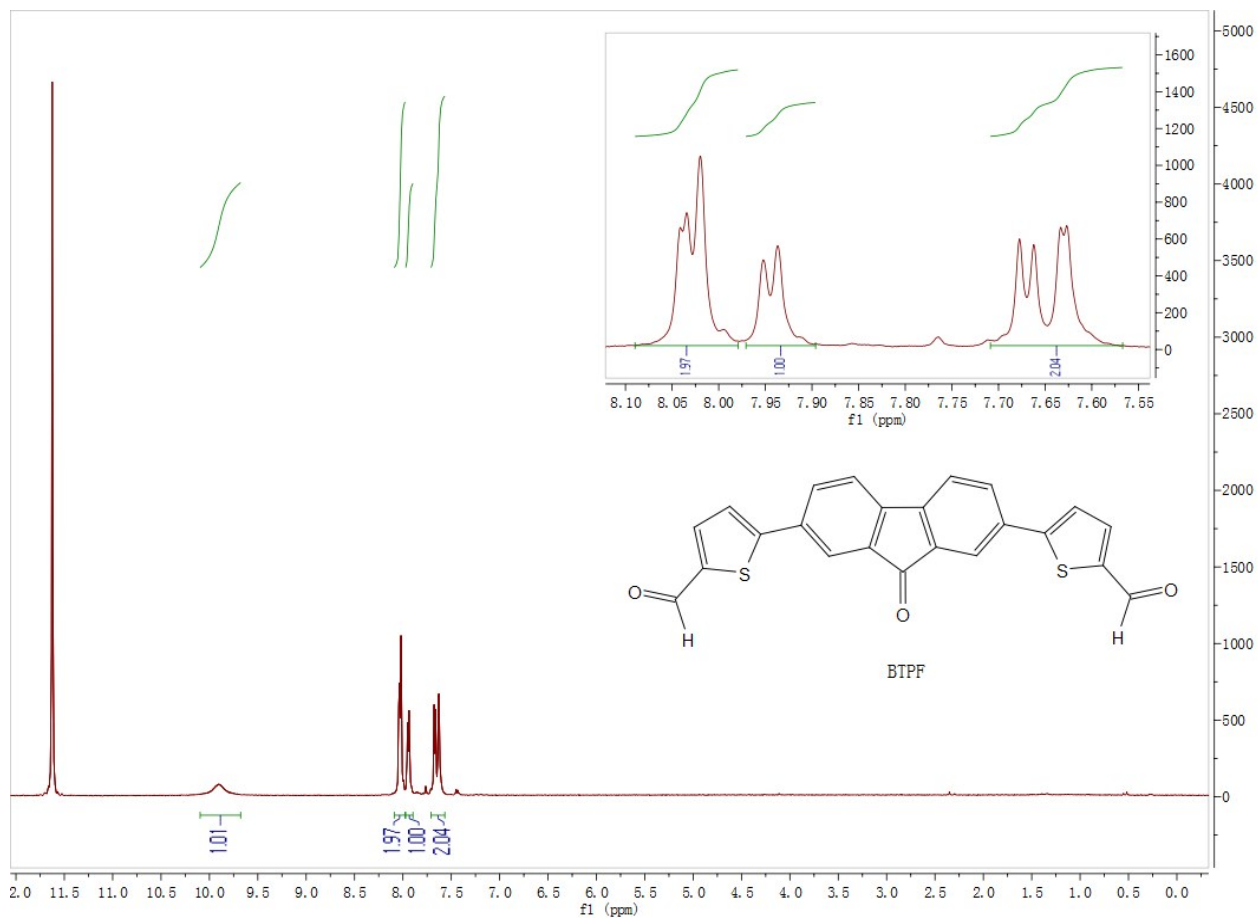

**Figure S5.** <sup>1</sup>H NMR spectrum (500 MHz, TFA) of compound **BTPF**.

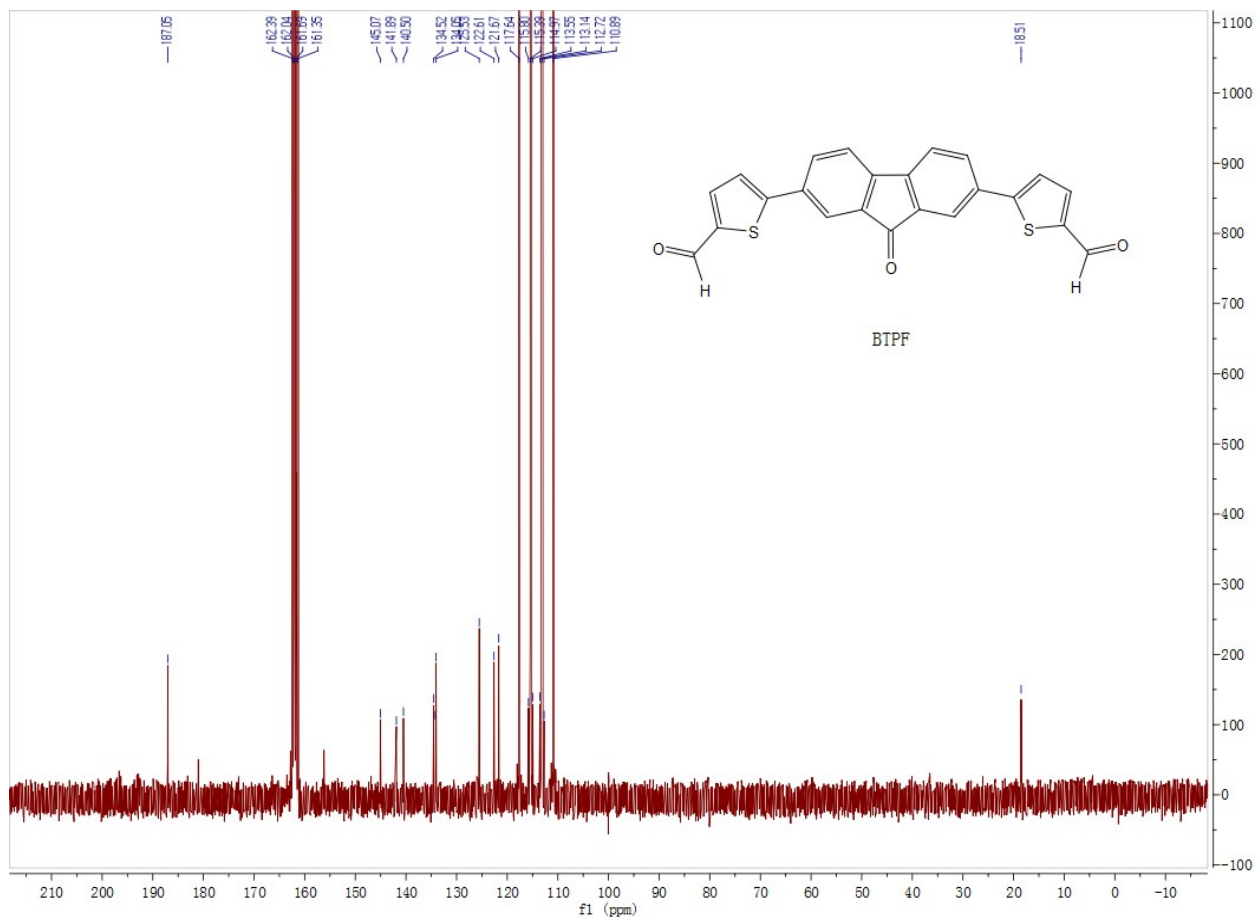

**Figure S6.**  $^{13}\text{C}$  NMR spectrum (125 MHz, TFA) of compound **BTPF**.

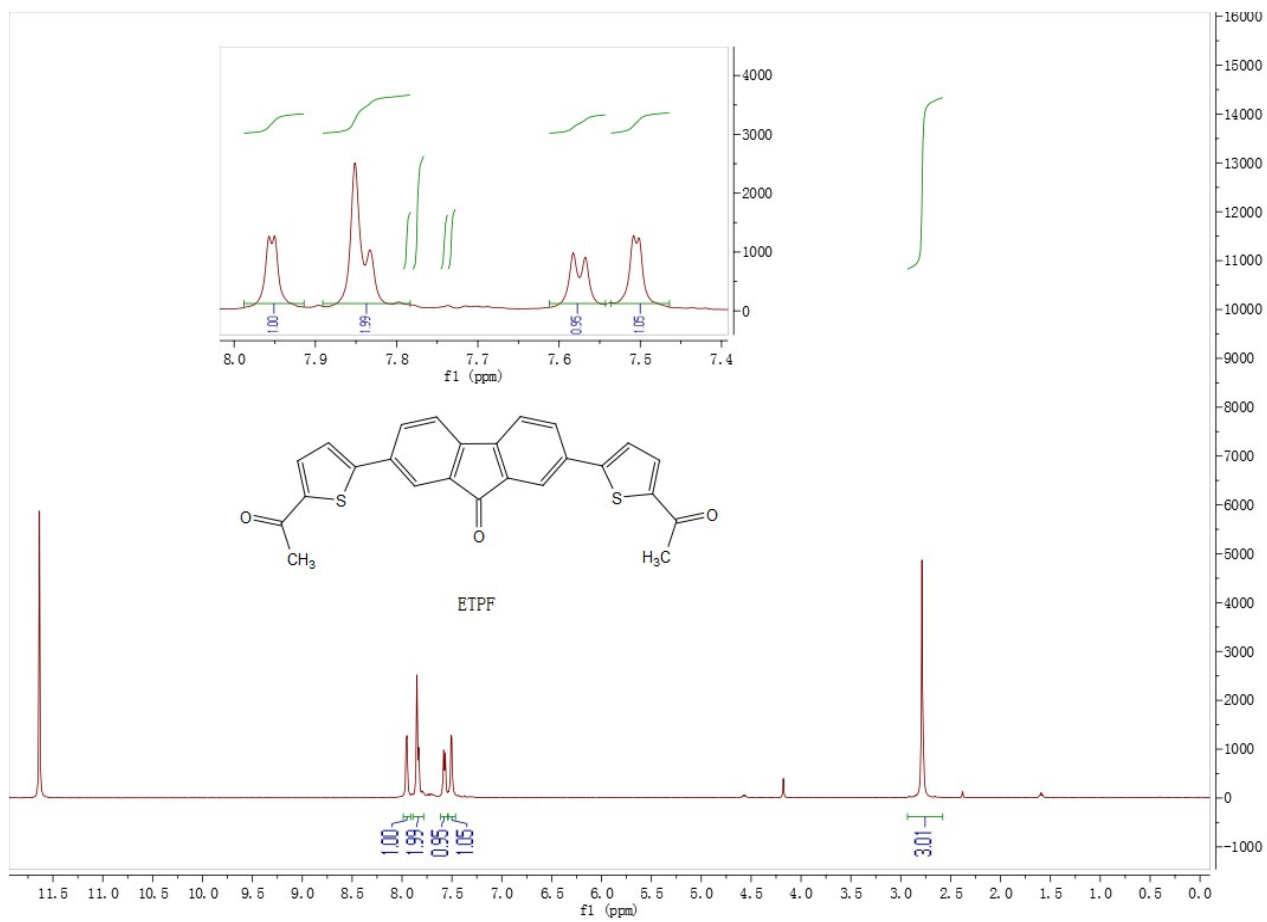

**Figure S7.** <sup>1</sup>H NMR spectrum (500 MHz, TFA) of compound **ETPF**.

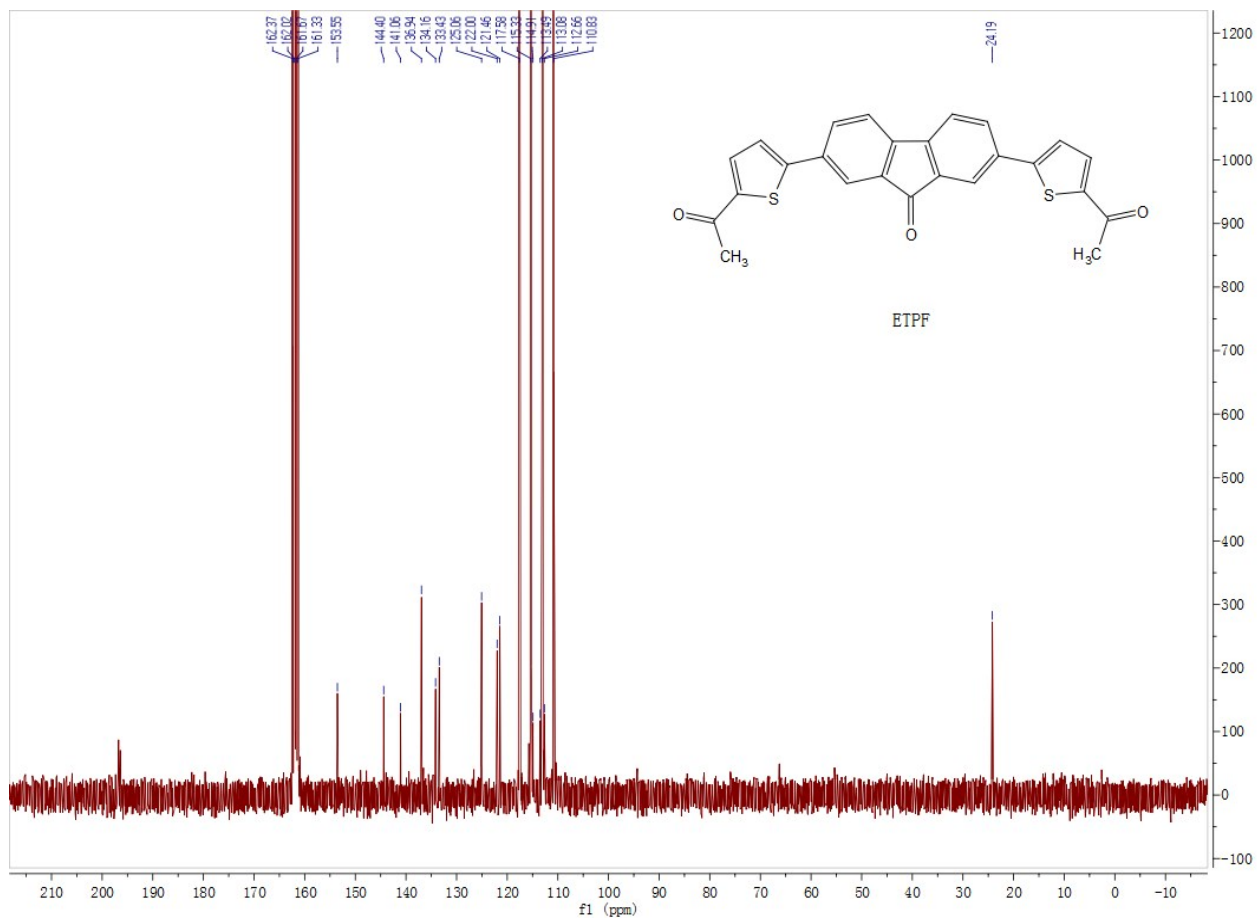

**Figure S8.**  $^{13}\text{C}$  NMR spectrum (125 MHz, TFA) of compound **ETPF**.

## 4. TOF-MS-EI

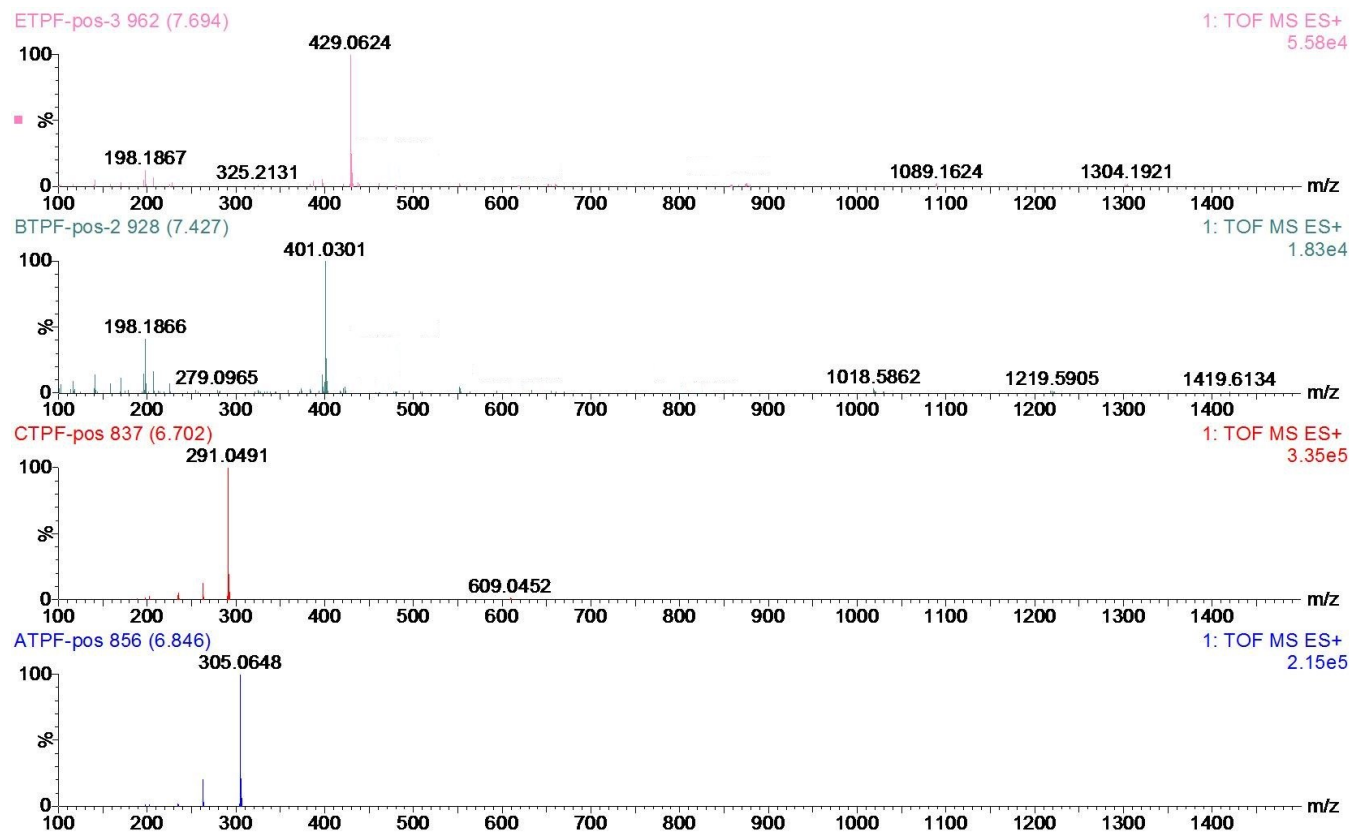

Figure S9. The TOF-MS-EI pictures of compounds CTPF, ATPF, BTPF and ETPF.
